# Supplementary material for: Comparison of Plasma Metabolome Response to Diets Enriched in Soybean and Partially-Hydrogenated Soybean Oil in Moderately Hypercholesterolemic Adults-A Pilot Study
Source: MDPI journal article supplement (doi:10.3390/metabo13040474), 2023-03-26
Supplement: s1 [file s1]

**Supplementary Table S1.** Composition of the 2 experimental diets

| Variables                 | SO-enriched diet | PHSO-enriched diet |
|---------------------------|------------------|--------------------|
|                           | % energy         |                    |
| Carbohydrate              | 52.1             | 53.9               |
| Protein                   | 16.7             | 17.2               |
| Total fat                 | 31.2             | 28.9               |
| SFA                       | 6.52             | 7.25               |
| MUFA                      | 6.48             | 9.95               |
| <i>Trans 18:1</i>         | 0.18             | 1.85               |
| PUFA                      | 12.7             | 8.66               |
| <i>Trans 18:2+18:3</i>    | 0.43             | 0.67               |
| Cholesterol (mg/1000kcal) | 57               | 63                 |
| Fiber (g/1000 kcal)       | 13.6             | 13.4               |

The table was adapted from the parent study [24]. PHSO, partially-hydrogenated soybean oil; MUFA, monounsaturated fatty acids; PUFA, polyunsaturated fatty acids; SFA, saturated fatty acids; SO, soybean oil.

**Supplementary Table S2.** The the IUPAC International Chemical Identifier, electrospray ionization mode, m/z value and retention time for the metabolites with Variable importance projection scores > 1.7

| Metabolites                | VIP score | InChI ID                    | ESI mode | m/z; Quant m/z* | RT; RT index* |
|----------------------------|-----------|-----------------------------|----------|-----------------|---------------|
| TG 56:9                    | 3.51      | HTODETRMAVZETG-GOCHBVGNSA-N | ESI (+)  | 918.7587        | 9.23          |
| PE O-38:6(PE O-18:1_20:5)  | 3.46      | KCNBSSYOJRUKOM-UHFFFAOYSA-N | ESI (-)  | 748.5292        | 6.02          |
| SM d36:3                   | 3.32      | YMTVMVYOUDDTQJ-UOMMIRHQSA-N | ESI (+)  | 727.5731        | 4.34          |
| PC 38:4(PC 18:1_20:3)      | 3.21      | JNKAOGSDBBXHEP-UHFFFAOYSA-N | ESI (-)  | 868.6069        | 5.73          |
| TG 54:8(TG 18:2_18:3_18:3) | 3.07      | IMPMCKKWKDAGE-UHFFFAOYSA-N  | ESI (+)  | 892.7405        | 8.97          |
| Benproperine               | 3.06      | JTUQXGZRVLWBCR-UHFFFAOYSA-N | ESI (+)  | 310.2109        | 1.59          |
| PE P-40:7 or PE O-40:8     | 2.97      | UKPNUUDYLNCIOE-IZHHWLPXSA-N | ESI (-)  | 772.5287        | 5.67          |
| TG 58:10                   | 2.94      | GXWBCAVCOMAOHT-VMCJOIRWSA-N | ESI (+)  | 944.7714        | 9.42          |
| TG 54:7                    | 2.93      | PRMRBZVOTCJWQD-UHFFFAOYSA-N | ESI (+)  | 894.7612        | 9.36          |
| PC 36:3                    | 2.84      | BXRLDROZWDUSGM-ZRYFCQOPSA-N | ESI (+)  | 784.5864        | 5.14          |
| PC 36:5                    | 2.84      | SUZYROYNFNQALJ-MHEIZRSESA-N | ESI (+)  | 780.5522        | 4.22          |
| DG 36:5                    | 2.76      | PGXBELQFNRPKBC-WBVIKXMWSA-N | ESI (+)  | 632.5231        | 5.42          |
| PC 36:1                    | 2.76      | ATHVAWFAEPLPPQ-VRDBWYNSSA-N | ESI (+)  | 788.615         | 6.09          |
| TG 54:8                    | 2.73      | BMPVTDWOWBNPJU-NYRSPQLFSA-N | ESI (+)  | 892.7392        | 9.15          |
| PC O-36:3                  | 2.67      | GDJAIASCRXEGBE-UHFFFAOYSA-N | ESI (+)  | 770.6038        | 5.50          |
| PC 37:5                    | 2.64      | GGSPKQXXUZFLNX-UHFFFAOYSA-N | ESI (+)  | 794.5871        | 4.80          |
| PC P-38:3 or PC O-38:4     | 2.63      | GWBOVQHRCURSPU-QMFAPAEZSA-N | ESI (-)  | 854.6267        | 4.46          |
| PC 36:5                    | 2.60      | DYDDZDMJSQYFGN-OIVUZXIWSA-N | ESI (-)  | 838.56          | 4.63          |
| TG 48:5                    | 2.59      | -                           | ESI (+)  | 814.6918        | 8.71          |
| PC 35:1                    | 2.52      | MFHIZGSSDZJFKD-IYEJTHTFSA-N | ESI (+)  | 774.598         | 5.77          |

|                               |      |                                  |         |          |         |
|-------------------------------|------|----------------------------------|---------|----------|---------|
| PE P-38:6 or PE O-38:7        | 2.51 | WVGALBKSWOUIEZ-<br>XNHMFJFDSA-N  | ESI (-) | 746.5137 | 5.63    |
| DG 36:4                       | 2.47 | MQGBAQLIFKSMEM-<br>ZHARMHCNSA-N  | ESI (+) | 634.5413 | 5.88    |
| PC O-36:4                     | 2.46 | AMIRMXUBGHUMRM-<br>UHFFFAOYSA-Ns | ESI (+) | 768.5922 | 5.41    |
| PC O-44:6                     | 2.45 | IYYVNINVOLHLIG-<br>UHFFFAOYSA-N  | ESI (+) | 876.6829 | 6.63    |
| TG 54:6(TG<br>18:2_18:2_18:2) | 2.40 | HBOQXIRUPVQLKX-<br>UHFFFAOYSA-N  | ESI (+) | 896.7751 | 9.75    |
| PC 34:1                       | 2.33 | WTJKGGKOPKCXLL-<br>VYOBOKEXSA-N  | ESI (+) | 760.5895 | 5.45    |
| PC P-36:1 or PC O-36:2        | 2.31 | ZOTYCHIFTCFAHC-<br>KOUVQCMKSA-N  | ESI (-) | 830.6269 | 6.57    |
| TG 56:8                       | 2.27 | UBGUHMDKDBGQUND-<br>VPFWBQFRSA-N | ESI (+) | 920.7745 | 9.67    |
| PC P-38:3 or PC O-38:4        | 2.16 | GWBOVQHRCURSPU-<br>QMFAPAEZSA-N  | ESI (-) | 854.6267 | 6.46    |
| PC 33:1                       | 2.14 | OFRWLQSOUIZELQ-<br>VEAYGOGPSA-N  | ESI (+) | 746.5717 | 5.14    |
| TG 51:5                       | 2.14 | DYYKLAQWCNBXRJ-<br>UNZGPCCPSA-N  | ESI (+) | 856.7463 | 9.55    |
| TG 50:5                       | 2.13 | AFTBPUXZTDLRSP-<br>UDQIKIEDSA-N  | ESI (+) | 842.7215 | 9.29    |
| SM 46:6;3O                    | 2.13 | PSFAINLNJQVRQ-<br>UHFFFAOYSA-N   | ESI (+) | 877.6781 | 6.64    |
| Serine                        | 2.13 | MTCFGRXMJLQNBG-<br>REOHCLBHSA-N  | -       | 204*     | 395020* |
| TG 52:6(TG<br>16:1_18:2_18:3) | 2.09 | NOOJQDXMGLPOOA-<br>UHFFFAOYSA-N  | ESI (+) | 868.7461 | 9.31    |
| TG 54:7(TG<br>16:1_18:2_20:4) | 2.09 | PRMRBZVOTCJWQD-<br>UHFFFAOYSA-N  | ESI (+) | 894.7633 | 9.61    |
| DG 38:6                       | 2.08 | YDVDXUYJFQLPEG-<br>CTHJWPIASA-N  | ESI (+) | 658.5394 | 5.73    |
| Glycerophosphocholine         | 2.07 | SUHOQUVVVLNYQR-<br>MRVPVSSYSA-N  | ESI (+) | 280.0919 | 8.34    |
| PC P-34:1 or PC O-34:2        | 2.02 | MBRHHFWRXQYYAN-<br>JEPFLRBFSA-N  | ESI (+) | 744.5901 | 5.34    |
| TG 58:9(TG<br>18:1_18:2_22:6) | 1.98 | RLAPDVQGJNAHOC-<br>UHFFFAOYSA-N  | ESI (+) | 946.785  | 9.81    |
| TG 54:2(TG<br>18:0_18:1_18:1) | 1.97 | RYNHWWNZNIGDAQ-<br>UHFFFAOYSA-N  | ESI (+) | 904.8436 | 11.22   |
| PC 32:2                       | 1.94 | GPWHCUUIQMGEIX-<br>VHQDNGOZSA-N  | ESI (+) | 730.538  | 4.40    |
| PC 33:2                       | 1.92 | SBNDHGBVMZMSNL-<br>UESLNCBNSA-N  | ESI (+) | 744.5529 | 4.68    |

|                            |      |                             |         |          |         |
|----------------------------|------|-----------------------------|---------|----------|---------|
| PC P-40:5 or PC O-40:6     | 1.92 | KUHMJRMPHBRAMY-DDURNVNNSA-N | ESI (+) | 820.6213 | 5.69    |
| 2,3-dihydroxybutanoic acid | 1.88 | LOUGYXZSURQALL-UHFFFAOYSA-N | -       | 292*     | 384796* |
| PC P-38:5 or PC O-38:6     | 1.87 | ATTCDOPAYPGSLE-LQULQHAGSA-N | ESI (-) | 850.5948 | 5.58    |
| PC 40:7                    | 1.86 | BPUROMFCPFGBOT-ZEGPSQTJSA-N | ESI (-) | 890.5906 | 5.26    |
| PI 36:1                    | 1.85 | YOBFISPJJWPPTK-JUCSSFOXSA-N | ESI (-) | 863.5665 | 5.41    |
| Linolenic acid             | 1.80 | DTOSIQBPBRVQHS-PDBXOOCHSA-N | ESI (-) | 277.2182 | 1.67    |
| TG 54:3(TG 18:0_18:1_18:2) | 1.79 | CNGSOZKJBWHOEG-UHFFFAOYSA-N | ESI (+) | 902.8325 | 10.86   |
| TG 54:8(TG 14:0_18:2_22:6) | 1.79 | AINACBPMKQPREK-UHFFFAOYSA-N | ESI (+) | 892.7395 | 9.28    |
| Tetradecylsulfate          | 1.73 | URLJMZWTXZTZRR-UHFFFAOYSA-N | ESI (-) | 293.1784 | 1.10    |
| PC O-34:2                  | 1.72 | WBAZRZTVRJLENP-UHFFFAOYSA-N | ESI (+) | 744.5881 | 5.75    |

Asterisk indicates the data were from gas chromatography time-of-flight mass spectrometry. DG, diacylglycerol; ESI, electrospray ionization; InChI, the IUPAC International Chemical Identifier; PC, phosphatidylcholine; PE, Phosphatidylethanolamine; RT, retention time; SM, Sphingomyelin; TG, triacylglycerol.

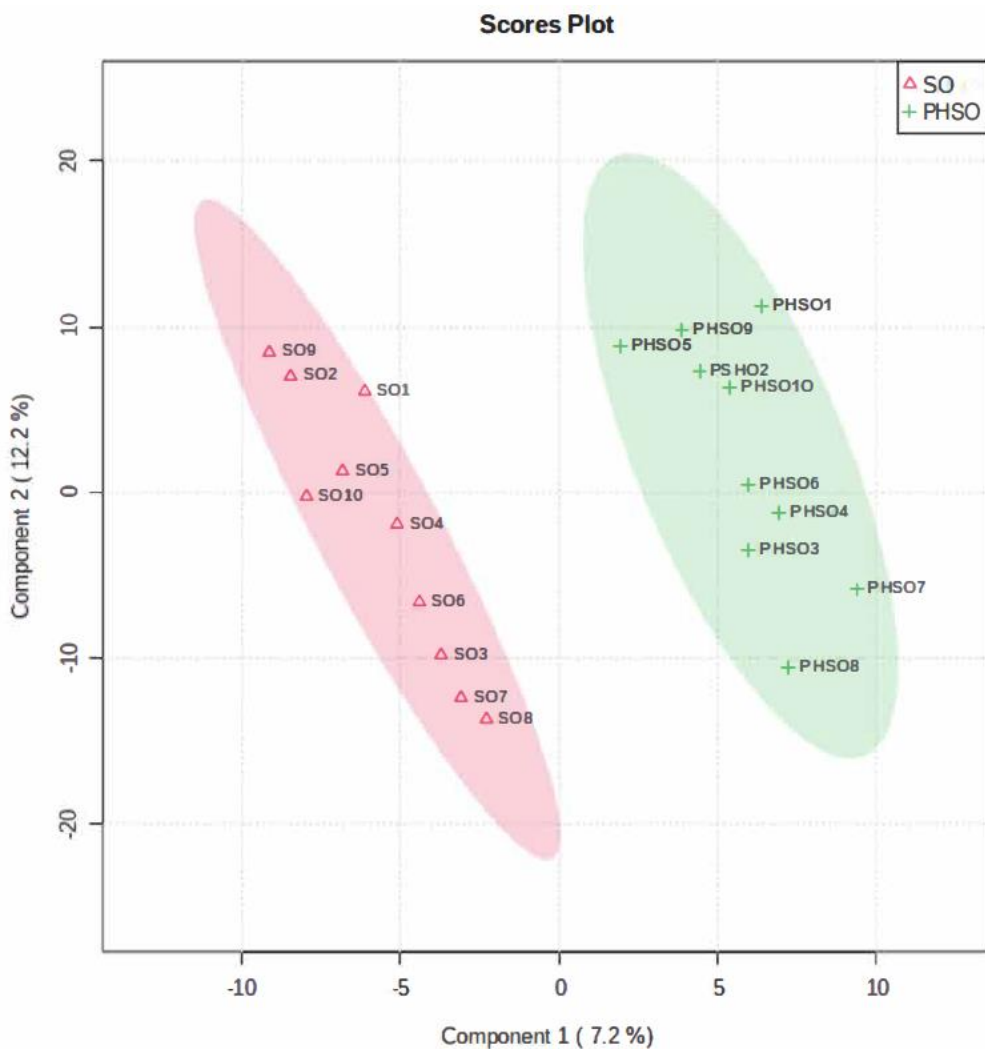

**Supplementary Figure S1.** Partial least squares discriminant analysis (PLS-DA) of the plasma metabolites in participants after they received soybean- or partially hydrogenated soybean (PHSO)-enriched diets
